# Supplementary material for: A new approach for synthesizing bulk-type all-solid-state lithium-ion batteries
Source: Royal Society of Chemistry journal article supplement (doi:10.1039/c8ta12375f), 2019-01-01
Supplement: c8ta12375f1.pdf [file c8ta12375f1.pdf]

# A New Approach for Synthesizing Bulk-type All-solid-state Lithium-ion Batteries

Linchun He<sup>1</sup>, Chao Chen<sup>1,2</sup>, Masashi Kotobuki<sup>1,2</sup>, Feng Zhen<sup>1</sup>, Henghui Zhou<sup>3,#</sup>, Li Lu<sup>1,2,\*</sup>

<sup>1</sup> Department of Mechanical Engineering  
National University of Singapore, Singapore 117575

<sup>2</sup> National University of Singapore Suzhou Research Institute  
Suzhou 215123, P. R. China

<sup>3</sup> College of Chemistry and Molecular Engineering  
Peking University, Beijing 100871, China

\* [mpeluli@nus.edu.sg](mailto:mpeluli@nus.edu.sg)

# [hhzhou@pku.edu.cn](mailto:hhzhou@pku.edu.cn)

## Supplementary Information

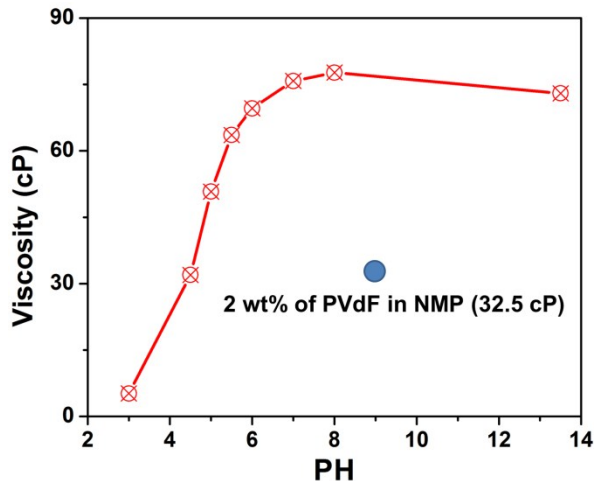

Figure S1 Viscosity of 2 wt.% PAALi solution changed with PH

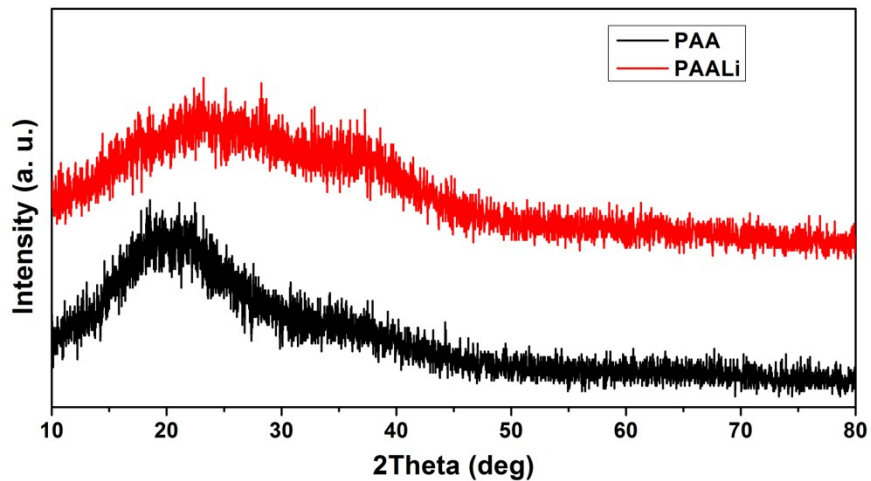

Figure S2 XRD spectrum of PAA and PAALi

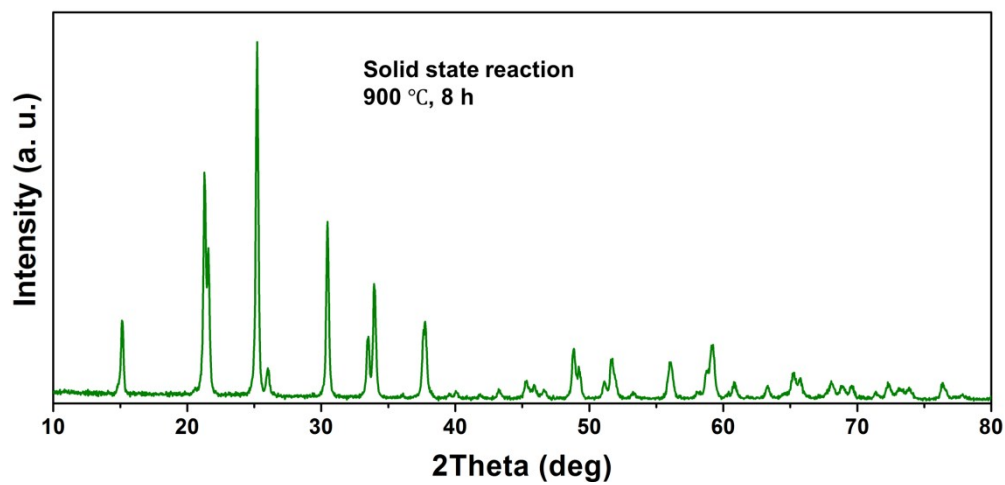

Figure S3 XRD pattern of LAGP pellet with NASICON structure

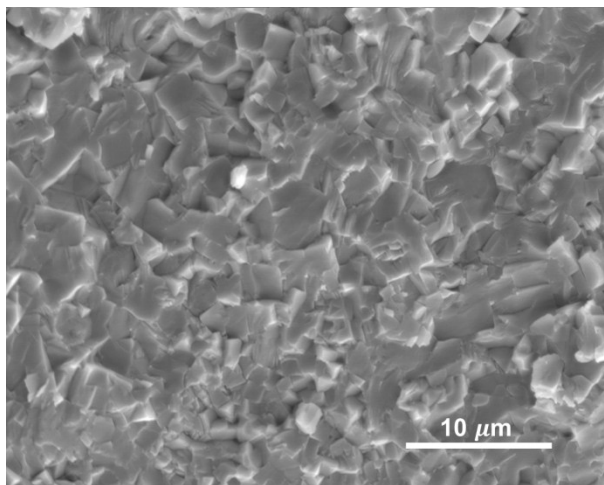

Figure S4 FE-SEM cross-section image of the LAGP pellet

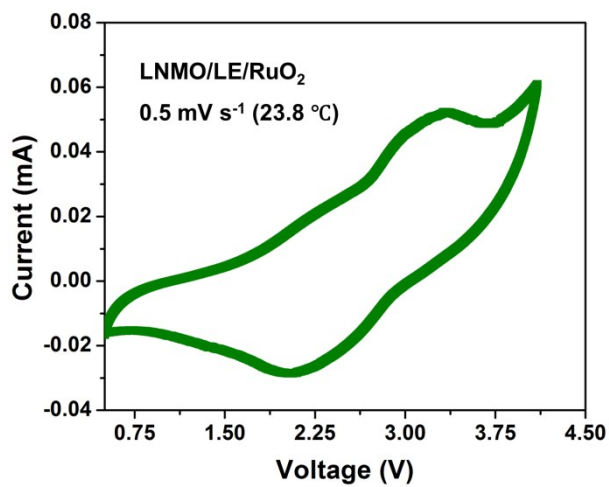

Figure S5 CV curve of LNMO/Liquid electrolyte (LE)/RuO<sub>2</sub> showing an oxidation peak between 2.3 V and 3.7 V and a reduction peak between 2.8 and 0.5 V

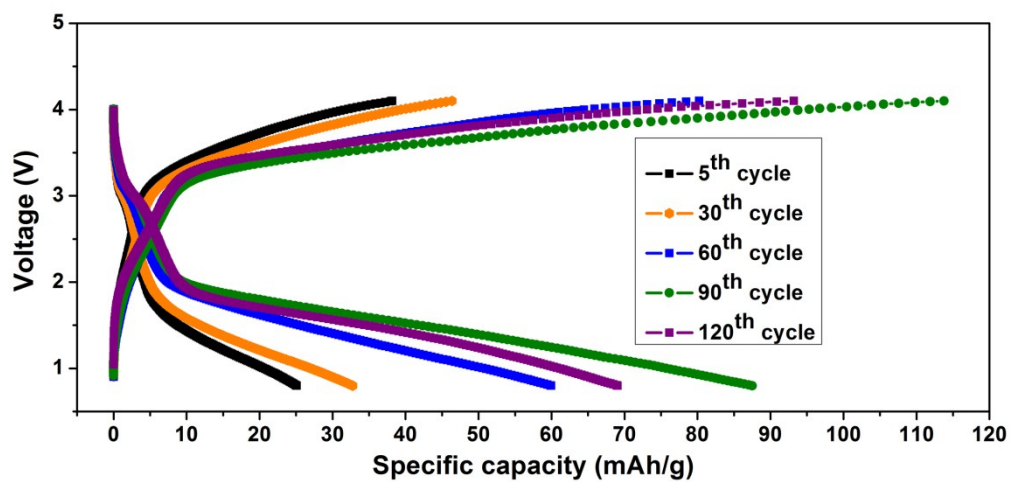

Figure S6 Voltage –specific capacity curves for charge/discharge at the 5<sup>th</sup>, 30<sup>th</sup>, 60<sup>th</sup>, 90<sup>th</sup> and 120<sup>th</sup> cycle for cell LNMO/LAGP/RuO<sub>2</sub> at room temperature

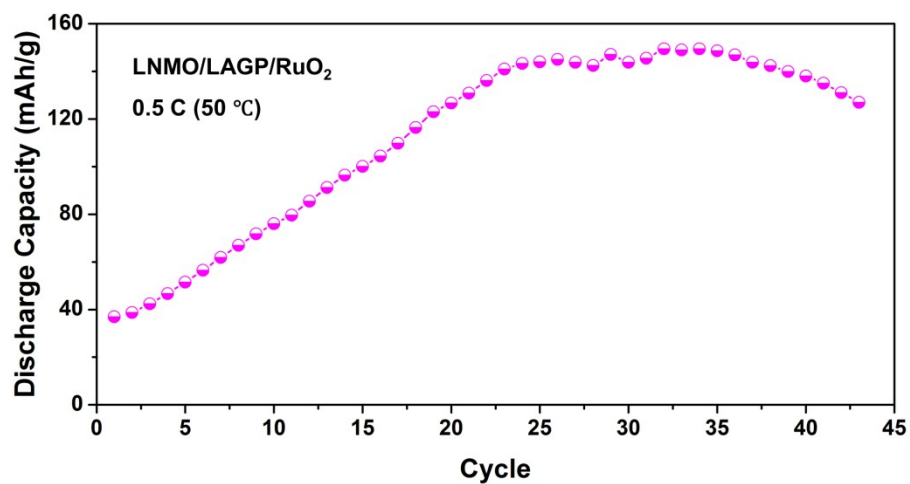

Figure S7 Discharge capacity of LNMO/LAGP/RuO<sub>2</sub> at 0.5 C (1 C=146.7 mAh g<sup>-1</sup>) at 50 °C
